# Supplementary material for: Nucleocapsid and Spike Proteins of the Coronavirus SARS-CoV-2 Induce IL6 in Monocytes and Macrophages—Potential Implications for Cytokine Storm Syndrome
Source: MDPI journal article supplement (doi:10.3390/vaccines9010054), 2021-01-15
Supplement: s1 [file s1]

## Supporting information

# Nucleocapsid and spike proteins of the coronavirus SARS-CoV-2 induce IL6 in monocytes and macrophages – potential implications for cytokine storm syndrome.

Iwona Karwaciak, Anna Sałkowska, Kaja Karaś, Jarosław Dastyk and Marcin Ratajewski

### Table of contents

|                   |    |
|-------------------|----|
| 1. Table S1.....  | S3 |
| 2. Figure S1..... | S4 |
| 3. Figure S2..... | S5 |

| Donor | Control | Protein S [0.1<br>µg/ml] | Protein S [0.4<br>µg/ml] | Protein S [1<br>µg/ml] | Boiled protein S<br>[1 µg/ml] | BSA [1<br>µg/ml] |
|-------|---------|--------------------------|--------------------------|------------------------|-------------------------------|------------------|
| 8     | 0.72    | 0.63                     | 2.66                     | 5.76                   | 0.71                          | 1.21             |

| Donor | Control | Protein N [0.1<br>µg/ml] | Protein N [0.4<br>µg/ml] | Protein N [1<br>µg/ml] | Boiled protein<br>N [1 µg/ml] | BSA [1<br>µg/ml] |
|-------|---------|--------------------------|--------------------------|------------------------|-------------------------------|------------------|
| 9     | 1.34    | 57.65                    | 876.50                   | 1870.21                | 0.96                          | 1.50             |

**Table S1.** mRNA expression of *IL6* gene in monocytes cultured in the presence of increasing concentrations SARS-CoV-2 proteins S (spike) and N (nucleocapsid), 1 µg/ml of the boiled (1h, 99°C) SARS-CoV-2 proteins S (spike) and N (nucleocapsid) and 1 µg/ml of BSA for 3 days. Control cells were treated with the equal volume of PBS. The expression of each mRNA was determined by real-time RT-PCR and normalized to the mRNA levels of the housekeeping genes *HPRT1*, *HMBS* and *RPL13A*, as described in the Materials and Methods.

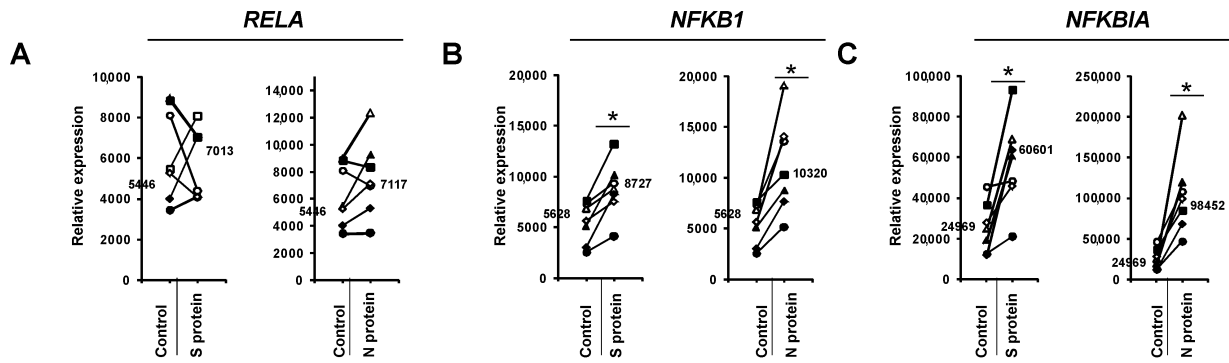

**Figure S1.** mRNA expression of *RELA* (A), *NFKB1* (B) and *NFKBIA* (C) genes in monocytes cultured in the presence of 1  $\mu$ g/ml SARS-CoV-2 proteins S (spike) and N (nucleocapsid) for 3 days. Control cells were treated with an equal volume of PBS. The expression of each mRNA was determined by real-time RT-PCR and normalized to the mRNA levels of the housekeeping genes *HPRT1*, *HMBS* and *RPL13A*, as described in the Materials and Methods. The data show individual values for seven independent donors ( $n = 7$ ), and straight lines connect the control value and the value after SARS-CoV-2 protein treatment from individual donors. The median values are also shown in the figures. An asterisk indicates a statistically significant difference at  $P < 0.05$ .

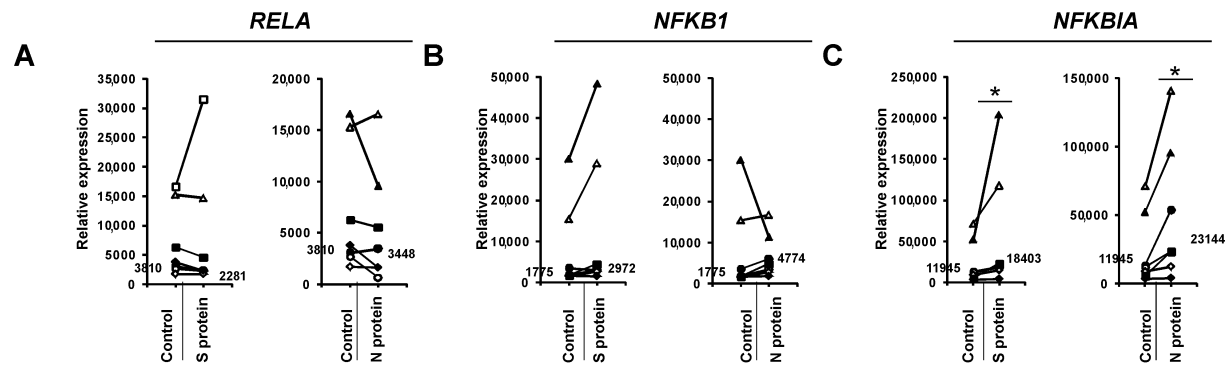

**Figure S2.** mRNA expression of *RELA* (A), *NFKB1* (B) and *NFKBIA* (C) in monocytes differentiated towards macrophages in the presence of 1  $\mu$ g/ml SARS-CoV-2 proteins S (spike) and N (nucleocapsid) for 5 days. Control cells were treated with an equal volume of PBS. The expression of each mRNA was determined by real-time RT-PCR and normalized to the mRNA levels of the housekeeping genes *HPRT1*, *HMBS* and *RPL13A*, as described in the Materials and Methods. The data show individual values for seven independent donors ( $n = 7$ ), and straight lines connect the control value and the value after SARS-CoV-2 protein treatment from individual donors. The median values are also shown in the figures. An asterisk indicates a statistically significant difference at  $P < 0.05$ .
